# Supplementary material
Source: Copernicus journal article supplement (doi:10.5194/egusphere-2026-1966)
Supplement: Supplementary file 1 [file egusphere-2026-1966-supplement.pdf]

Supplement of

# **Nutrient and dissolved organic carbon leaching in temperate alley-cropping agroforestry and open cropland**

Sarah Choe<sup>1\*</sup>, Dan Niu<sup>1</sup>, Raphael Manu<sup>1</sup>, Fasil M. Rettie<sup>2,3</sup>, Edzo Veldkamp<sup>1</sup> and Marife D. Corre<sup>1</sup>

<sup>1</sup>Soil Science of Tropical and Subtropical Ecosystems, Faculty of Forest Sciences and Forest Ecology, University of Göttingen, Büsgenweg 2, 37077 Göttingen, Germany

<sup>2</sup>CIMMYT, Addis Ababa, Ethiopia

<sup>3</sup>Department of Biogeophysics, University of Hohenheim, Emil Wolff Str. 27 70593 Stuttgart, Germany

*Correspondence to:* Sarah Choe (sarah.choe@uni-goettingen.de)

**Table S1. Site and climatic characteristics of alley-cropping agroforestry and open cropland on the three soil types (sites): sandy Arenosol (Vechta), loam Phaeozem (Dornburg) and clay Cambisol (Wendhausen).**

| Characteristics in the 0–0.3 m depth                                                |                              | Site                           |                           |                              |                    |     |
|-------------------------------------------------------------------------------------|------------------------------|--------------------------------|---------------------------|------------------------------|--------------------|-----|
| Location                                                                            | Vechta                       | Dornburg                       |                           | Wendhausen                   |                    |     |
|                                                                                     | 52°45' N, 8°32' E            | 51°00' N, 11°38' E             |                           | 52°20' N, 10°37' E           |                    |     |
| Soil type                                                                           | Arenosol                     | Calcaric Phaeozem              |                           | Vertic Cambisol              |                    |     |
| Texture (% sand-silt-clay)                                                          | 80–13–7                      | 6–66–28                        |                           | 21–40–39                     |                    |     |
| pH in 0–0.3 m                                                                       | 6.1 ± 0.1                    | 7.1 ± 0.2                      |                           | 7.2 ± 0.2                    |                    |     |
| Total N (kg N m <sup>-2</sup> ) in 0–0.3 m                                          | 0.4 ± 0.0 kg m <sup>-2</sup> | 0.5 ± 0.0 kg m <sup>-2</sup>   |                           | 0.7 ± 0.0 kg m <sup>-2</sup> |                    |     |
| Soil organic carbon (kg C m <sup>-2</sup> ) in 0–0.3 m                              | 5.6 ± 0.4 kg m <sup>-2</sup> | 5.17 ± 0.20 kg m <sup>-2</sup> |                           | 6.8 ± 0.4 kg m <sup>-2</sup> |                    |     |
| Effective cation exchange capacity (mmol <sub>c</sub> kg <sup>-1</sup> ) in 0–0.3 m | 36.5 ± 2.1                   | 257.8 ± 44.3                   |                           | 351.6 ± 36.3                 |                    |     |
| Year of agroforestry establishment                                                  | 2019                         | 2007                           |                           | 2008                         |                    |     |
| Starting planting density                                                           | 2222 trees ha <sup>-1</sup>  | 2222 trees ha <sup>-1</sup>    |                           | 10000 trees ha <sup>-1</sup> |                    |     |
| Harvest of trees in agroforestry                                                    | None                         | 01/2014                        |                           | 01/2013, 01/2021             |                    |     |
| Total precipitation (mm) during the crop rotation                                   | Silage corn (2019)           | 197                            | Spring barley (2019)      | 196                          | Silage corn (2019) | 306 |
|                                                                                     | Winter rye (2019–2020)       | 570                            | Fallow (2019–2020)        | 290                          | Fallow (2019–2020) | 225 |
|                                                                                     | Fallow (2020–2021)           | 246                            | Winter wheat (2020–2021)  | 663                          | Silage corn (2020) | 212 |
|                                                                                     | Potato (2021)                | 389                            | Winter barley (2021–2022) | 356                          |                    |     |
|                                                                                     | Winter rye (2021–2022)       | 327                            |                           |                              |                    |     |
| Long-term mean annual precipitation (mm) 2012–2022                                  | 665 ± 36                     | 556 ± 29                       |                           | 575 ± 36                     |                    |     |
| Annual precipitation during the study year (mm)                                     | 2019                         | 625                            | 450                       | 505                          |                    |     |
|                                                                                     | 2020                         | 506                            | 494                       | 465                          |                    |     |
|                                                                                     | 2021                         | 503                            | 698                       |                              |                    |     |
|                                                                                     | 2022                         | 509                            | 547                       |                              |                    |     |

**Table S2. Soil parameters used in the Expert-N water sub-model for alley-cropping agroforestry (AF) and open cropland (OC) on the three soil types (sites): sandy Arenosol (Vechta), loam Phaeozem (Dornburg) and clay Cambisol (Wendhausen).**

| Soil type (site)           | Soil parameters                                        | AFtree | AFcrop 1m | AFcrop 7m | AFcrop 24m | OC    |
|----------------------------|--------------------------------------------------------|--------|-----------|-----------|------------|-------|
| Sandy Arenosol (Vechta)    | Porosity (vol %)                                       | 52     |           |           |            |       |
|                            | Field capacity (vol %)                                 | 41     |           |           |            |       |
|                            | Wilting point (vol %)                                  | 10.5   |           |           |            |       |
|                            | Saturated hydraulic conductivity (mm d <sup>-1</sup> ) | 528    | 588       | 588       | 522        | 585   |
|                            | Van Genuchten $\alpha$ (cm <sup>-1</sup> )             | 0.06   | 0.05      | 0.03      | 0.05       | 0.04  |
|                            | Van Genuchten n                                        | 1.66   | 1.82      | 1.82      | 1.63       | 1.78  |
| Loam Phaeozem (Dornburg)   | Porosity (vol %)                                       | 46.4   |           |           |            |       |
|                            | Field capacity (vol %)                                 | 41     |           |           |            |       |
|                            | Wilting point (vol %)                                  | 10.5   |           |           |            |       |
|                            | Saturated hydraulic conductivity (mm d <sup>-1</sup> ) | 400    | 364       | 298       | 298        | 98.6  |
|                            | Van Genuchten $\alpha$ (cm <sup>-1</sup> )             | 0.039  | 0.052     | 0.052     | 0.053      | 0.102 |
|                            | Van Genuchten n                                        | 1.35   | 1.34      | 1.33      | 1.33       | 1.29  |
| Clay Cambisol (Wendhausen) | Porosity (vol %)                                       | 43.2   |           |           |            |       |
|                            | Field capacity (vol %)                                 | 46     |           |           |            |       |
|                            | Wilting point (vol %)                                  | 15.5   |           |           |            |       |
|                            | Saturated hydraulic conductivity (mm d <sup>-1</sup> ) | 297    | 142       | 224       | 224        | 224   |
|                            | Van Genuchten $\alpha$ (cm <sup>-1</sup> )             | 0.129  | 0.17      | 0.19      | 0.146      | 0.206 |
|                            | Van Genuchten n                                        | 1.16   | 1.2       | 1.19      | 1.19       | 1.19  |

**Table S3. Mean leaching fluxes ( $\pm$  SE,  $n = 4$ ) of  $\text{NH}_4^+$ ,  $\text{NO}_3^-$ , dissolved organic N (DON), dissolved organic C (DOC), and K ( $\text{kg N, C, and K ha}^{-1}$ ) in alley-cropping agroforestry at 1 m, 7 m, and 24 m from the tree to the crop row on the three soil types (sites): sandy Arenosol (Vechta), loam Phaeozem (Dornburg) and clay Cambisol (Wendhausen).**

| Soil type (site)           | Crop rotation | Distance within AFcrop | $\text{NH}_4^+$ | $\text{NO}_3^-$ | DON           | DOC           | K             |
|----------------------------|---------------|------------------------|-----------------|-----------------|---------------|---------------|---------------|
| Sandy Arenosol (Vechta)    | Silage corn   | 1m                     | $0.0 \pm 0.0$   | $0.9 \pm 0.3$   | $0.1 \pm 0.0$ | $0.4 \pm 0.2$ | $0.7 \pm 0.3$ |
|                            | 05/2019-      | 7m                     | $0.0 \pm 0.0$   | $0.0 \pm 0.0$   | $0.0 \pm 0.0$ | $0.0 \pm 0.0$ | $0.0 \pm 0.0$ |
|                            | 09/2019       | 24m                    | $0.0 \pm 0.0$   | $0.7 \pm 0.5$   | $0.1 \pm 0.0$ | $0.7 \pm 0.4$ | $1.4 \pm 0.7$ |
|                            | Winter rye    | 1m                     | $1.0 \pm 0.8$   | $61 \pm 8.5$    | $3.4 \pm 0.6$ | $45 \pm 11$   | $39 \pm 6.1$  |
|                            | 10/2019-      | 7m                     | $0.3 \pm 0.0$   | $37 \pm 28$     | $1.9 \pm 0.5$ | $32 \pm 11$   | $13 \pm 5.7$  |
|                            | 08/2020       | 24m                    | $1.5 \pm 1.1$   | $51 \pm 18$     | $4.3 \pm 0.7$ | $46 \pm 17$   | $37 \pm 6.6$  |
|                            | Fallow        | 1m                     | $0.1 \pm 0.0$   | $0.4 \pm 0.2$   | $1.0 \pm 0.3$ | $20 \pm 4.9$  | $5.6 \pm 1.3$ |
|                            | 09/2020-      | 7m                     | $0.1 \pm 0.0$   | $0.5 \pm 0.2$   | $0.6 \pm 0.3$ | $14 \pm 6.9$  | $3.9 \pm 1.9$ |
|                            | 03/2021       | 24m                    | $0.1 \pm 0.0$   | $1.3 \pm 0.8$   | $1.2 \pm 0.5$ | $22 \pm 9.1$  | $7.7 \pm 3.5$ |
|                            | Potato        | 1m                     | $0.0 \pm 0.0$   | $0.2 \pm 0.1$   | $0.0 \pm 0.0$ | $0.1 \pm 0.0$ | $0.2 \pm 0.1$ |
|                            | 04/2021-      | 7m                     | $0.0 \pm 0.0$   | $0.6 \pm 0.5$   | $0.0 \pm 0.0$ | $0.5 \pm 0.4$ | $0.7 \pm 0.6$ |
|                            | 10/2021       | 24m                    | $0.0 \pm 0.0$   | $0.1 \pm 0.1$   | $0.0 \pm 0.0$ | $0.1 \pm 0.0$ | $0.2 \pm 0.1$ |
|                            | Winter rye    | 1m                     | $0.1 \pm 0.0$   | $2.1 \pm 1.4$   | $0.4 \pm 0.2$ | $5.9 \pm 3.8$ | $4.0 \pm 2.3$ |
|                            | 11/2021-      | 7m                     | $0.0 \pm 0.0$   | $1.6 \pm 1.6$   | $0.0 \pm 0.0$ | $1.6 \pm 1.6$ | $1.2 \pm 1.2$ |
| 07/2022                    | 24m           | $0.0 \pm 0.0$          | $0.0 \pm 0.0$   | $0.0 \pm 0.0$   | $0.0 \pm 0.0$ | $0.0 \pm 0.0$ |               |
| Loam Phaeozem (Dornburg)   | Spring barley | 1m                     | $0.0 \pm 0.0$   | $0.7 \pm 0.6$   | $0.1 \pm 0.0$ | $0.6 \pm 0.6$ | $0.0 \pm 0.0$ |
|                            | 03/2019-      | 7m                     | $0.0 \pm 0.0$   | $1.8 \pm 1.8$   | $0.1 \pm 0.1$ | $2.0 \pm 2.0$ | $0.0 \pm 0.0$ |
|                            | 07/2019       | 24m                    | $0.0 \pm 0.0$   | $4.2 \pm 1.4$   | $0.1 \pm 0.0$ | $0.3 \pm 0.2$ | $0.0 \pm 0.0$ |
|                            | Fallow        | 1m                     | $0.0 \pm 0.0$   | $0.4 \pm 0.4$   | $0.0 \pm 0.0$ | $2.3 \pm 1.4$ | $0.2 \pm 0.2$ |
|                            | 08/2019-      | 7m                     | $0.0 \pm 0.0$   | $1.7 \pm 0.2$   | $0.1 \pm 0.0$ | $4.0 \pm 1.5$ | $0.0 \pm 0.0$ |
|                            | 02/2020       | 24m                    | $0.0 \pm 0.0$   | $0.9 \pm 0.1$   | $0.0 \pm 0.0$ | $0.5 \pm 0.2$ | $0.0 \pm 0.0$ |
|                            | Winter wheat  | 1m                     | $0.1 \pm 0.0$   | $2.5 \pm 1.3$   | $0.6 \pm 0.2$ | $33 \pm 15$   | $0.4 \pm 0.2$ |
|                            | 10/2020-      | 7m                     | $0.3 \pm 0.1$   | $11 \pm 3.5$    | $0.7 \pm 0.2$ | $22 \pm 7.6$  | $0.4 \pm 0.2$ |
|                            | 08/2021       | 24m                    | $0.1 \pm 0.1$   | $7.0 \pm 5.4$   | $0.5 \pm 0.3$ | $12 \pm 8.0$  | $0.2 \pm 0.2$ |
|                            | Winter barley | 1m                     | $0.1 \pm 0.0$   | $0.1 \pm 0.0$   | $0.4 \pm 0.1$ | $47 \pm 14$   | $0.4 \pm 0.1$ |
| 10/2021-                   | 7m            | $0.1 \pm 0.0$          | $1.4 \pm 0.8$   | $0.5 \pm 0.3$   | $46 \pm 27$   | $0.2 \pm 0.2$ |               |
| 07/2022                    | 24m           | $0.3 \pm 0.2$          | $9.7 \pm 3.5$   | $0.3 \pm 0.3$   | $21 \pm 8.7$  | $0.2 \pm 0.2$ |               |
| Clay Cambisol (Wendhausen) | Silage corn   | 1m                     | $0.0 \pm 0.0$   | $0.6 \pm 0.6$   | $0.0 \pm 0.0$ | $0.0 \pm 0.0$ | $0.0 \pm 0.0$ |
|                            | 04/2019-      | 7m                     | $0.0 \pm 0.0$   | $3.0 \pm 1.9$   | $0.1 \pm 0.1$ | $4.0 \pm 4.0$ | $0.1 \pm 0.1$ |
|                            | 10/2019       | 24m                    | $0.0 \pm 0.0$   | $1.8 \pm 1.8$   | $0.2 \pm 0.1$ | $0.4 \pm 0.4$ | $0.2 \pm 0.1$ |
|                            | Fallow        | 1m                     | $0.3 \pm 0.1$   | $31 \pm 18$     | $1.0 \pm 0.6$ | $20 \pm 10$   | $0.8 \pm 0.3$ |
|                            | 11/2019-      | 7m                     | $0.0 \pm 0.0$   | $3.0 \pm 3.0$   | $0.0 \pm 0.0$ | $1.3 \pm 1.3$ | $0.1 \pm 0.1$ |
|                            | 03/2020       | 24m                    | $0.2 \pm 0.1$   | $24 \pm 11$     | $0.8 \pm 0.3$ | $14 \pm 6.7$  | $0.6 \pm 0.4$ |
|                            | Silage corn   | 1m                     | $0.0 \pm 0.0$   | $0.0 \pm 0.0$   | $0.0 \pm 0.0$ | $0.0 \pm 0.0$ | $0.0 \pm 0.0$ |
|                            | 04/2020-      | 7m                     | $0.0 \pm 0.0$   | $7.7 \pm 5.4$   | $0.4 \pm 0.2$ | $6.3 \pm 6.3$ | $0.1 \pm 0.1$ |
|                            | 09/2020       | 24m                    | $0.1 \pm 0.0$   | $8.9 \pm 3.3$   | $0.4 \pm 0.2$ | $32 \pm 16$   | $0.2 \pm 0.1$ |

**Table S4. Statistical results from linear mixed-effects (LME) model evaluating the effect of management, i.e., alley-cropping agroforestry (AF, area-weighted between the tree row and the sampling distances within the crop row) vs. open cropland (OC) on z-transformed leaching fluxes of  $\text{NO}_3^-$ , dissolved organic nitrogen (DON), dissolved organic carbon (DOC), and K in each soil type (site). The LME model includes management system as a fixed effect and replicate plot and crop rotation as random effects; numerator degrees of freedom = 1; denominator degrees of freedom = 6.**

| Soil type (site)           | Leaching fluxes | <i>F</i> value | <i>p</i> -value | <i>n</i> (AF or OC) |
|----------------------------|-----------------|----------------|-----------------|---------------------|
| Sandy Arenosol (Vechta)    | $\text{NO}_3^-$ | 5.01           | 0.07            | 20                  |
|                            | DON             | 2.24           | 0.19            | 20                  |
|                            | DOC             | 2.59           | 0.16            | 20                  |
|                            | K               | 7.44           | <b>0.03</b>     | 20                  |
| Loam Phaeozem (Dornburg)   | $\text{NO}_3^-$ | 3.62           | 0.11            | 16                  |
|                            | DON             | 2.43           | 0.17            | 16                  |
|                            | DOC             | 9.88           | <b>0.02</b>     | 16                  |
|                            | K               | 5.99           | 0.99            | 16                  |
| Clay Cambisol (Wendhausen) | $\text{NO}_3^-$ | 0.058          | 0.81            | 12                  |
|                            | DON             | 1.02           | 0.35            | 12                  |
|                            | DOC             | 0.44           | 0.53            | 12                  |
|                            | K               | 0.59           | 0.47            | 12                  |

**Table S5. Mean ( $\pm$  SE,  $n = 4$ ) above-ground crop N and C ( $\text{g N}$  and  $\text{C m}^{-2}$ ) in alley-cropping agroforestry at 1 m, 7 m, and 24 m from the tree to the crop row (AFcrop) on the three soil types (sites): sandy Arenosol (Vechta), loam Phaeozem (Dornburg) and clay Cambisol (Wendhausen).**

| Soil type (site)                | Crop rotation                    | Distance within AFcrop         | Crop N ( $\text{g N m}^{-2}$ ) | Crop C ( $\text{g C m}^{-2}$ ) |              |
|---------------------------------|----------------------------------|--------------------------------|--------------------------------|--------------------------------|--------------|
| Sandy Arenosol (Vechta)         | Silage corn<br>05/2019–09/2019   | 1m                             | 27 $\pm$ 2                     | 966 $\pm$ 102                  |              |
|                                 |                                  | 7m                             | 24 $\pm$ 2                     | 946 $\pm$ 61                   |              |
|                                 |                                  | 24m                            | 28 $\pm$ 3                     | 1023 $\pm$ 116                 |              |
|                                 | Winter rye<br>10/2019–08/2020    | 1m                             | 5 $\pm$ 0                      | 189 $\pm$ 13                   |              |
|                                 |                                  | 7m                             | 6 $\pm$ 0                      | 218 $\pm$ 13                   |              |
|                                 |                                  | 24m                            | 7 $\pm$ 0                      | 224 $\pm$ 8                    |              |
|                                 | Potato<br>04/2021–10/2021        | 1m                             | 11 $\pm$ 1                     | 400 $\pm$ 30                   |              |
|                                 |                                  | 7m                             | 13 $\pm$ 1                     | 443 $\pm$ 12                   |              |
|                                 |                                  | 24m                            | 15 $\pm$ 1                     | 479 $\pm$ 20                   |              |
|                                 | Winter rye<br>11/2021–07/2022    | 1m                             | 7 $\pm$ 0                      | 237 $\pm$ 13                   |              |
|                                 |                                  | 7m                             | 7 $\pm$ 0                      | 248 $\pm$ 16                   |              |
|                                 |                                  | 24m                            | 9 $\pm$ 0                      | 279 $\pm$ 16                   |              |
| Loam Phaeozem (Dornburg)        | Spring barley<br>03/2019–07/2019 | 1m                             | 3 $\pm$ 1                      | 87 $\pm$ 7                     |              |
|                                 |                                  | 7m                             | 8 $\pm$ 0.2                    | 207 $\pm$ 3                    |              |
|                                 |                                  | 24m                            | 11 $\pm$ 0.4                   | 234 $\pm$ 10                   |              |
|                                 | Winter wheat<br>10/2020–08/2021  | 1m                             | 10 $\pm$ 1                     | 195 $\pm$ 16                   |              |
|                                 |                                  | 7m                             | 15 $\pm$ 1                     | 297 $\pm$ 16                   |              |
|                                 |                                  | 24m                            | 18 $\pm$ 1                     | 310 $\pm$ 9                    |              |
|                                 | Winter barley<br>10/2021–07/2022 | 1m                             | 6 $\pm$ 1                      | 196 $\pm$ 18                   |              |
|                                 |                                  | 7m                             | 10 $\pm$ 0                     | 294 $\pm$ 17                   |              |
|                                 |                                  | 24m                            | 10 $\pm$ 0                     | 307 $\pm$ 9                    |              |
|                                 | Clay Cambisol (Wendhausen)       | Silage corn<br>04/2019–10/2019 | 1m                             | 1 $\pm$ 0                      | 21 $\pm$ 11  |
|                                 |                                  |                                | 7m                             | 14 $\pm$ 2                     | 510 $\pm$ 73 |
|                                 |                                  |                                | 24m                            | 18 $\pm$ 1                     | 695 $\pm$ 15 |
| Silage corn 04/2020–<br>09/2020 |                                  | 1m                             | 1 $\pm$ 0                      | 36 $\pm$ 6                     |              |
|                                 |                                  | 7m                             | 18 $\pm$ 1                     | 787 $\pm$ 24                   |              |
|                                 |                                  | 24m                            | 19 $\pm$ 1                     | 875 $\pm$ 43                   |              |

**Table S6. Spearman's rank correlation coefficients ( $\rho$ ) between leaching fluxes of  $\text{NO}_3^-$ , dissolved organic N (DON), dissolved organic C (DOC), and K with controlling factors for alley-cropping agroforestry tree row (AFtree), crop row (AFcrop), and open cropland (OC) across crop rotations and sites (\*  $0.08 > p > 0.05$ , \*\*  $p \leq 0.05$ , \*\*\*  $p \leq 0.01$ ). Leaching fluxes are expressed as  $\text{kg N, C or K ha}^{-1}$  per crop rotation or year (for AFtree); drainage flux and precipitation in mm per crop rotation; sand in percent; nitrogen uptake efficiency in  $\text{kg crop-N kg}^{-1}$  fertilizer-N.**

| AFtree ( $n = 44$ )      | Tree age | DOC leaching | DON leaching | K leaching | $\text{NO}_3^-$ leaching | Drainage | Precipitation |
|--------------------------|----------|--------------|--------------|------------|--------------------------|----------|---------------|
| DOC leaching             | -0.74*** |              |              |            |                          |          |               |
| DON leaching             | -0.15*** | 0.50         |              |            |                          |          |               |
| K leaching               | -0.42*** | 0.70**       | 0.94***      |            |                          |          |               |
| $\text{NO}_3^-$ leaching | -0.80*** | 0.88***      | 0.56*        | 0.74**     |                          |          |               |
| Drainage                 | 0.06*    | 0.49         | 0.69**       | 0.63**     | 0.30                     |          |               |
| Precipitation            | 0.14*    | 0.30         | 0.67**       | 0.56*      | 0.20                     | 0.55*    |               |
| Sand content             | -0.77*** | 0.77***      | 0.18***      | 0.40       | 0.68**                   | 0.19     | 0.05          |

| AFcrop ( $n = 44$ )      | Tree age | DOC leaching | DON leaching | K leaching | $\text{NO}_3^-$ leaching | Drainage | Precipitation | Sand content |
|--------------------------|----------|--------------|--------------|------------|--------------------------|----------|---------------|--------------|
| DOC leaching             | -0.29    |              |              |            |                          |          |               |              |
| DON leaching             | 0.52*    | 0.1          |              |            |                          |          |               |              |
| K leaching               | -0.06    | -0.04        | 0.63**       |            |                          |          |               |              |
| $\text{NO}_3^-$ leaching | -0.08    | 0.79***      | 0.01         | -0.24      |                          |          |               |              |
| Drainage                 | 0.32     | 0.29         | 0.81***      | 0.76***    | -0.15                    |          |               |              |
| Precipitation            | 0.14     | -0.20        | 0.43         | 0.74***    | -0.24                    | 0.55*    |               |              |

|                            |          |       |       |       |      |       |       |       |
|----------------------------|----------|-------|-------|-------|------|-------|-------|-------|
| Sand content               | -0.77*** | 0.37  | -0.32 | 0.31  | 0.19 | -0.07 | 0.05  |       |
| Nitrogen uptake efficiency | -0.03    | -0.47 | -0.28 | -0.62 | 0.28 | -0.77 | -0.50 | -0.39 |

---

| OC (n = 44)                           | DOC leaching | DON leaching | K leaching | NO <sub>3</sub> <sup>-</sup> leaching | Drainage | Precipitation | Sand content |
|---------------------------------------|--------------|--------------|------------|---------------------------------------|----------|---------------|--------------|
| DON leaching                          | 0.03         |              |            |                                       |          |               |              |
| K leaching                            | 0.18         | 0.72***      |            |                                       |          |               |              |
| NO <sub>3</sub> <sup>-</sup> leaching | 0.52*        | -0.16        | 0.24       |                                       |          |               |              |
| Drainage                              | 0.39         | 0.77***      | 0.85***    | 0.10                                  |          |               |              |
| Precipitation                         | -0.26        | 0.48         | 0.60**     | -0.23                                 | 0.47     |               |              |
| Sand content                          | 0.57**       | -0.21        | 0.22       | 0.25                                  | 0.12     | -0.05         |              |
| Nitrogen uptake efficiency            | -0.38        | -0.43        | -0.78**    | 0.08                                  | -0.77**  | -0.71**       | -0.41        |

---

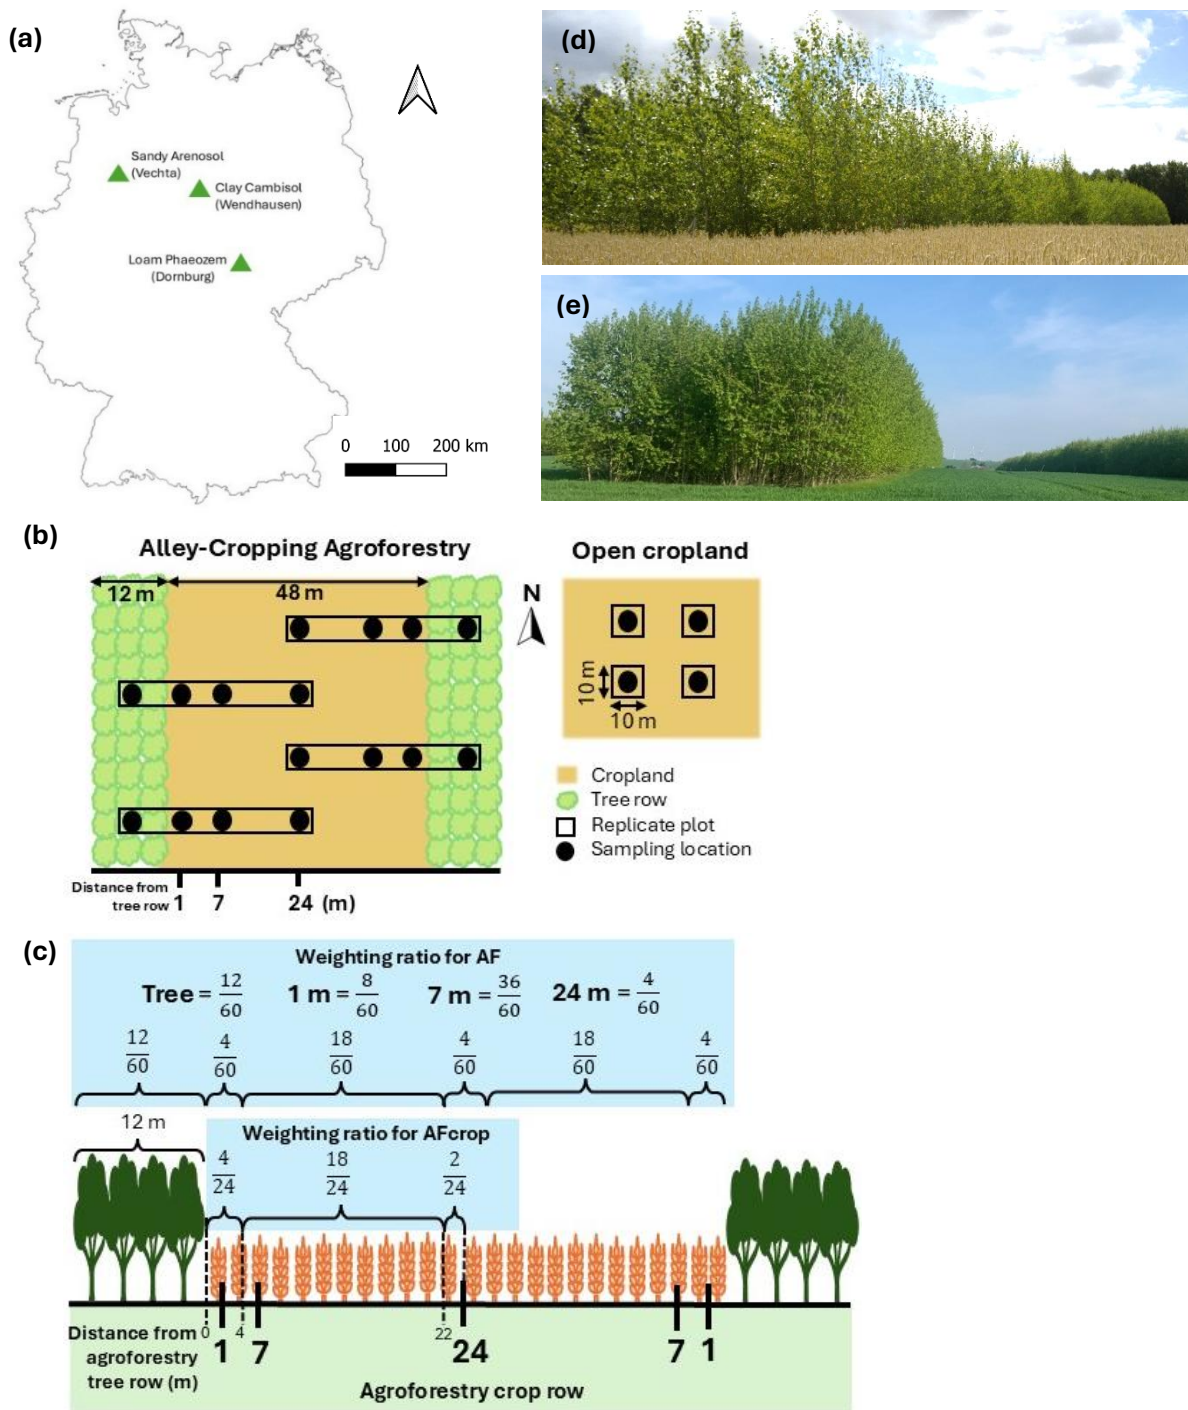

Figure S1. (a) Locations of the three study sites in Germany; (b) schematic representation of the sampling design in alley-cropping agroforestry (AF) and open cropland (OC); (c) the weighting factors used to calculate the area-weighted average for the overall AF (between the AF tree and AF crop rows) and weighted-average for the AF crop row; (d) AF with a 4-year-old poplar (*Populus nigra* × *P. maximowiczii*) on sandy Arenosol soil in Vechta (July 2022); (e) AF with an 8-year-old poplar on loam Phaeozem soil in Dornburg (April 2022). Photo credit: Sarah Choe.
